# Supplementary material
Source: publisher figshare collection journal article supplement (https://sage.figshare.com/ndownloader/files/18667412)
Supplement: Supplementary file 1 [file 18667412]

**Supplemental Table 1. Exposure-adjusted incidence of serious adverse events**

|                                | Double-blind treatment phase |                 |                 |                 | Long-term extension phase |                 |                  |
|--------------------------------|------------------------------|-----------------|-----------------|-----------------|---------------------------|-----------------|------------------|
|                                | Placebo                      | Erenumab        |                 |                 | Erenumab                  |                 |                  |
|                                |                              | 70 mg           | 140 mg          | All             | 70 mg                     | 140 mg          | All              |
|                                | N = 1043                     | N = 893         | N = 507         | N = 1400        | N = 1891                  | N = 933         | N = 2375         |
|                                | (pt-yr = 321.7)              | (pt-yr = 285.7) | (pt-yr = 193.5) | (pt-yr = 479.3) | (pt-yr = 1782.5)          | (pt-yr = 822.9) | (pt-yr = 2605.3) |
|                                | n [r]                        | n [r]           | n [r]           | n [r]           | n [r]                     | n [r]           | n [r]            |
| Serious adverse events         | 20 [6.3]                     | 18 [6.4]        | 10 [5.2]        | 28 [5.9]        | 72 [4.1]                  | 38 [4.7]        | 106 [4.2]        |
| SAEs by preferred term         |                              |                 |                 |                 |                           |                 |                  |
| Migraine                       | 2 [0.6]                      | 3 [1.1]         | 0 [0.0]         | 3 [0.6]         | 2 [0.1]                   | 2 [0.2]         | 4 [0.2]          |
| Noncardiac chest pain          | 1 [0.3]                      | 2 [0.7]         | 1 [0.5]         | 3 [0.6]         | 1 [< 0.1]                 | 0 [0.0]         | 1 [< 0.1]        |
| Intervertebral disc protrusion | 1 [0.3]                      | 2 [0.7]         | 0 [0.0]         | 2 [0.4]         | 3 [0.2]                   | 0 [0.0]         | 3 [0.1]          |
| Cholelithiasis                 | 0 [0.0]                      | 2 [0.7]         | 0 [0.0]         | 2 [0.4]         | 0 [0.0]                   | 0 [0.0]         | 0 [0.0]          |
| Uterine leiomyoma              | 1 [0.3]                      | 0 [0.0]         | 1 [0.5]         | 1 [0.2]         | 2 [0.1]                   | 2 [0.2]         | 4 [0.2]          |
| Syncope                        | 0 [0.0]                      | 0 [0.0]         | 1 [0.5]         | 1 [0.2]         | 4 [0.2]                   | 0 [0.0]         | 4 [0.2]          |
| Appendicitis                   | 0 [0.0]                      | 1 [0.4]         | 0 [0.0]         | 1 [0.2]         | 1 [< 0.1]                 | 2 [0.2]         | 3 [0.1]          |
| Ovarian cyst                   | 0 [0.0]                      | 1 [0.4]         | 0 [0.0]         | 1 [0.2]         | 1 [< 0.1]                 | 0 [0.0]         | 1 [< 0.1]        |
| Gastroenteritis viral          | 0 [0.0]                      | 0 [0.0]         | 1 [0.5]         | 1 [0.2]         | 1 [< 0.1]                 | 0 [0.0]         | 1 [< 0.1]        |
| Abdominal adhesions            | 0 [0.0]                      | 0 [0.0]         | 1 [0.5]         | 1 [0.2]         | 1 [< 0.1]                 | 0 [0.0]         | 1 [< 0.1]        |

[illegible]

|                          |         |         |         |         |           |         |           |
|--------------------------|---------|---------|---------|---------|-----------|---------|-----------|
| Breast cancer            | 0 [0.0] | 0 [0.0] | 0 [0.0] | 0 [0.0] | 2 [0.1]   | 1 [0.1] | 3 [0.1]   |
| Adjustment disorder      | 0 [0.0] | 0 [0.0] | 0 [0.0] | 0 [0.0] | 1 [< 0.1] | 1 [0.1] | 2 [< 0.1] |
| Deep vein thrombosis     | 0 [0.0] | 0 [0.0] | 0 [0.0] | 0 [0.0] | 2 [0.1]   | 0 [0.0] | 2 [< 0.1] |
| Ligament rupture         | 0 [0.0] | 0 [0.0] | 0 [0.0] | 0 [0.0] | 2 [0.1]   | 0 [0.0] | 2 [< 0.1] |
| Pneumonia                | 0 [0.0] | 0 [0.0] | 0 [0.0] | 0 [0.0] | 1 [< 0.1] | 1 [0.1] | 2 [< 0.1] |
| Papillary thyroid cancer | 0 [0.0] | 0 [0.0] | 0 [0.0] | 0 [0.0] | 2 [0.1]   | 0 [0.0] | 2 [< 0.1] |
| Myocardial ischemia      | 0 [0.0] | 0 [0.0] | 0 [0.0] | 0 [0.0] | 2 [0.1]   | 0 [0.0] | 2 [< 0.1] |
| Osteoarthritis           | 1 [0.3] | 0 [0.0] | 0 [0.0] | 0 [0.0] | 1 [< 0.1] | 0 [0.0] | 1 [< 0.1] |
| Cholecystitis            | 1 [0.3] | 0 [0.0] | 0 [0.0] | 0 [0.0] | 1 [< 0.1] | 0 [0.0] | 1 [< 0.1] |
| Hypersensitivity         | 2 [0.6] | 0 [0.0] | 0 [0.0] | 0 [0.0] | 0 [0.0]   | 0 [0.0] | 0 [0.0]   |
| Endometriosis            | 1 [0.3] | 0 [0.0] | 0 [0.0] | 0 [0.0] | 1 [< 0.1] | 0 [0.0] | 1 [< 0.1] |
| Fall                     | 1 [0.3] | 0 [0.0] | 0 [0.0] | 0 [0.0] | 0 [0.0]   | 0 [0.0] | 0 [0.0]   |
| Intentional overdose     | 1 [0.3] | 0 [0.0] | 0 [0.0] | 0 [0.0] | 0 [0.0]   | 0 [0.0] | 0 [0.0]   |
| Vomiting                 | 1 [0.3] | 0 [0.0] | 0 [0.0] | 0 [0.0] | 0 [0.0]   | 0 [0.0] | 0 [0.0]   |
| Arthralgia               | 1 [0.3] | 0 [0.0] | 0 [0.0] | 0 [0.0] | 0 [0.0]   | 0 [0.0] | 0 [0.0]   |
| Parotitis                | 1 [0.3] | 0 [0.0] | 0 [0.0] | 0 [0.0] | 0 [0.0]   | 0 [0.0] | 0 [0.0]   |
| Pancreatitis             | 1 [0.3] | 0 [0.0] | 0 [0.0] | 0 [0.0] | 0 [0.0]   | 0 [0.0] | 0 [0.0]   |
| Hyponatremia             | 1 [0.3] | 0 [0.0] | 0 [0.0] | 0 [0.0] | 0 [0.0]   | 0 [0.0] | 0 [0.0]   |
| Flank pain               | 1 [0.3] | 0 [0.0] | 0 [0.0] | 0 [0.0] | 0 [0.0]   | 0 [0.0] | 0 [0.0]   |
| Cholecystitis acute      | 1 [0.3] | 0 [0.0] | 0 [0.0] | 0 [0.0] | 0 [0.0]   | 0 [0.0] | 0 [0.0]   |

|                            |         |         |         |         |           |         |           |
|----------------------------|---------|---------|---------|---------|-----------|---------|-----------|
| Visual impairment          | 0 [0.0] | 0 [0.0] | 0 [0.0] | 0 [0.0] | 1 [< 0.1] | 0 [0.0] | 1 [< 0.1] |
| Faecaloma                  | 0 [0.0] | 0 [0.0] | 0 [0.0] | 0 [0.0] | 1 [< 0.1] | 0 [0.0] | 1 [< 0.1] |
| Cellulitis                 | 0 [0.0] | 0 [0.0] | 0 [0.0] | 0 [0.0] | 1 [< 0.1] | 0 [0.0] | 1 [< 0.1] |
| Abdominal hernia           | 0 [0.0] | 0 [0.0] | 0 [0.0] | 0 [0.0] | 1 [< 0.1] | 0 [0.0] | 1 [< 0.1] |
| Metatarsalgia              | 0 [0.0] | 0 [0.0] | 0 [0.0] | 0 [0.0] | 1 [< 0.1] | 0 [0.0] | 1 [< 0.1] |
| Menorrhagia                | 0 [0.0] | 0 [0.0] | 0 [0.0] | 0 [0.0] | 1 [< 0.1] | 0 [0.0] | 1 [< 0.1] |
| Musculoskeletal chest pain | 0 [0.0] | 0 [0.0] | 0 [0.0] | 0 [0.0] | 1 [< 0.1] | 0 [0.0] | 1 [< 0.1] |
| Pulmonary embolism         | 0 [0.0] | 0 [0.0] | 0 [0.0] | 0 [0.0] | 1 [< 0.1] | 0 [0.0] | 1 [< 0.1] |
| Thrombosis                 | 0 [0.0] | 0 [0.0] | 0 [0.0] | 0 [0.0] | 1 [< 0.1] | 0 [0.0] | 1 [< 0.1] |
| Lumbar radiculopathy       | 0 [0.0] | 0 [0.0] | 0 [0.0] | 0 [0.0] | 1 [< 0.1] | 0 [0.0] | 1 [< 0.1] |
| Fallopian tube cyst        | 0 [0.0] | 0 [0.0] | 0 [0.0] | 0 [0.0] | 1 [< 0.1] | 0 [0.0] | 1 [< 0.1] |
| Colitis ischaemic          | 0 [0.0] | 0 [0.0] | 0 [0.0] | 0 [0.0] | 1 [< 0.1] | 0 [0.0] | 1 [< 0.1] |
| Diverticulum               | 0 [0.0] | 0 [0.0] | 0 [0.0] | 0 [0.0] | 1 [< 0.1] | 0 [0.0] | 1 [< 0.1] |
| Optic neuritis             | 0 [0.0] | 0 [0.0] | 0 [0.0] | 0 [0.0] | 1 [< 0.1] | 0 [0.0] | 1 [< 0.1] |
| Postprocedural edema       | 0 [0.0] | 0 [0.0] | 0 [0.0] | 0 [0.0] | 0 [0.0]   | 1 [0.1] | 1 [< 0.1] |
| Pelvi-ureteric obstruction | 0 [0.0] | 0 [0.0] | 0 [0.0] | 0 [0.0] | 0 [0.0]   | 1 [0.1] | 1 [< 0.1] |
| Hepatic cyst               | 0 [0.0] | 0 [0.0] | 0 [0.0] | 0 [0.0] | 1 [< 0.1] | 0 [0.0] | 1 [< 0.1] |
| Rectal prolapse            | 0 [0.0] | 0 [0.0] | 0 [0.0] | 0 [0.0] | 0 [0.0]   | 1 [0.1] | 1 [< 0.1] |
| Rotator cuff syndrome      | 0 [0.0] | 0 [0.0] | 0 [0.0] | 0 [0.0] | 0 [0.0]   | 1 [0.1] | 1 [< 0.1] |
| Gastroenteritis            | 0 [0.0] | 0 [0.0] | 0 [0.0] | 0 [0.0] | 1 [< 0.1] | 0 [0.0] | 1 [< 0.1] |

|                                     |         |         |         |         |               |         |               |
|-------------------------------------|---------|---------|---------|---------|---------------|---------|---------------|
| Migraine with aura                  | 0 [0.0] | 0 [0.0] | 0 [0.0] | 0 [0.0] | 1 [ $< 0.1$ ] | 0 [0.0] | 1 [ $< 0.1$ ] |
| Dyspepsia                           | 0 [0.0] | 0 [0.0] | 0 [0.0] | 0 [0.0] | 1 [ $< 0.1$ ] | 0 [0.0] | 1 [ $< 0.1$ ] |
| Gastritis                           | 0 [0.0] | 0 [0.0] | 0 [0.0] | 0 [0.0] | 1 [ $< 0.1$ ] | 0 [0.0] | 1 [ $< 0.1$ ] |
| Femur fracture                      | 0 [0.0] | 0 [0.0] | 0 [0.0] | 0 [0.0] | 1 [ $< 0.1$ ] | 0 [0.0] | 1 [ $< 0.1$ ] |
| Cauda equina syndrome               | 0 [0.0] | 0 [0.0] | 0 [0.0] | 0 [0.0] | 0 [0.0]       | 1 [0.1] | 1 [ $< 0.1$ ] |
| Lumbar spinal stenosis              | 0 [0.0] | 0 [0.0] | 0 [0.0] | 0 [0.0] | 0 [0.0]       | 1 [0.1] | 1 [ $< 0.1$ ] |
| Spinal compression fracture         | 0 [0.0] | 0 [0.0] | 0 [0.0] | 0 [0.0] | 0 [0.0]       | 1 [0.1] | 1 [ $< 0.1$ ] |
| Wound                               | 0 [0.0] | 0 [0.0] | 0 [0.0] | 0 [0.0] | 1 [ $< 0.1$ ] | 0 [0.0] | 1 [ $< 0.1$ ] |
| Anemia                              | 0 [0.0] | 0 [0.0] | 0 [0.0] | 0 [0.0] | 0 [0.0]       | 1 [0.1] | 1 [ $< 0.1$ ] |
| Laryngeal hematoma                  | 0 [0.0] | 0 [0.0] | 0 [0.0] | 0 [0.0] | 1 [ $< 0.1$ ] | 0 [0.0] | 1 [ $< 0.1$ ] |
| Presyncope                          | 0 [0.0] | 0 [0.0] | 0 [0.0] | 0 [0.0] | 0 [0.0]       | 1 [0.1] | 1 [ $< 0.1$ ] |
| Radicular syndrome                  | 0 [0.0] | 0 [0.0] | 0 [0.0] | 0 [0.0] | 0 [0.0]       | 1 [0.1] | 1 [ $< 0.1$ ] |
| Volvulus                            | 0 [0.0] | 0 [0.0] | 0 [0.0] | 0 [0.0] | 1 [ $< 0.1$ ] | 0 [0.0] | 1 [ $< 0.1$ ] |
| Toxic encephalopathy                | 0 [0.0] | 0 [0.0] | 0 [0.0] | 0 [0.0] | 1 [ $< 0.1$ ] | 0 [0.0] | 1 [ $< 0.1$ ] |
| Pneumococcal bacteraemia            | 0 [0.0] | 0 [0.0] | 0 [0.0] | 0 [0.0] | 1 [ $< 0.1$ ] | 0 [0.0] | 1 [ $< 0.1$ ] |
| Acute respiratory distress syndrome | 0 [0.0] | 0 [0.0] | 0 [0.0] | 0 [0.0] | 1 [ $< 0.1$ ] | 0 [0.0] | 1 [ $< 0.1$ ] |
| Tubo-ovarian abscess                | 0 [0.0] | 0 [0.0] | 0 [0.0] | 0 [0.0] | 0 [0.0]       | 1 [0.1] | 1 [ $< 0.1$ ] |
| Hypoglycaemia                       | 0 [0.0] | 0 [0.0] | 0 [0.0] | 0 [0.0] | 0 [0.0]       | 1 [0.1] | 1 [ $< 0.1$ ] |
| Atrial fibrillation                 | 0 [0.0] | 0 [0.0] | 0 [0.0] | 0 [0.0] | 1 [ $< 0.1$ ] | 0 [0.0] | 1 [ $< 0.1$ ] |
| Blood potassium decreased           | 0 [0.0] | 0 [0.0] | 0 [0.0] | 0 [0.0] | 0 [0.0]       | 1 [0.1] | 1 [ $< 0.1$ ] |

|                                     |         |         |         |         |               |         |               |
|-------------------------------------|---------|---------|---------|---------|---------------|---------|---------------|
| Urticaria                           | 0 [0.0] | 0 [0.0] | 0 [0.0] | 0 [0.0] | 1 [ $< 0.1$ ] | 0 [0.0] | 1 [ $< 0.1$ ] |
| Oesophagitis                        | 0 [0.0] | 0 [0.0] | 0 [0.0] | 0 [0.0] | 0 [0.0]       | 1 [0.1] | 1 [ $< 0.1$ ] |
| Nasal septal operation              | 0 [0.0] | 0 [0.0] | 0 [0.0] | 0 [0.0] | 1 [ $< 0.1$ ] | 0 [0.0] | 1 [ $< 0.1$ ] |
| Postprocedural infection            | 0 [0.0] | 0 [0.0] | 0 [0.0] | 0 [0.0] | 1 [ $< 0.1$ ] | 0 [0.0] | 1 [ $< 0.1$ ] |
| Gastro-oesophageal reflux disease   | 0 [0.0] | 0 [0.0] | 0 [0.0] | 0 [0.0] | 1 [ $< 0.1$ ] | 0 [0.0] | 1 [ $< 0.1$ ] |
| Pancreatic cysts                    | 0 [0.0] | 0 [0.0] | 0 [0.0] | 0 [0.0] | 1 [ $< 0.1$ ] | 0 [0.0] | 1 [ $< 0.1$ ] |
| Postoperative abscess               | 0 [0.0] | 0 [0.0] | 0 [0.0] | 0 [0.0] | 1 [ $< 0.1$ ] | 0 [0.0] | 1 [ $< 0.1$ ] |
| Alcoholism                          | 0 [0.0] | 0 [0.0] | 0 [0.0] | 0 [0.0] | 1 [ $< 0.1$ ] | 0 [0.0] | 1 [ $< 0.1$ ] |
| Prolactin-producing pituitary tumor | 0 [0.0] | 0 [0.0] | 0 [0.0] | 0 [0.0] | 0 [0.0]       | 1 [0.1] | 1 [ $< 0.1$ ] |
| Erysipelas                          | 0 [0.0] | 0 [0.0] | 0 [0.0] | 0 [0.0] | 0 [0.0]       | 1 [0.1] | 1 [ $< 0.1$ ] |
| Breast fibroma                      | 0 [0.0] | 0 [0.0] | 0 [0.0] | 0 [0.0] | 0 [0.0]       | 1 [0.1] | 1 [ $< 0.1$ ] |
| Idiopathic orbital inflammation     | 0 [0.0] | 0 [0.0] | 0 [0.0] | 0 [0.0] | 1 [ $< 0.1$ ] | 0 [0.0] | 1 [ $< 0.1$ ] |
| Nasal septum deviation              | 0 [0.0] | 0 [0.0] | 0 [0.0] | 0 [0.0] | 1 [ $< 0.1$ ] | 0 [0.0] | 1 [ $< 0.1$ ] |
| Breast cyst                         | 0 [0.0] | 0 [0.0] | 0 [0.0] | 0 [0.0] | 0 [0.0]       | 1 [0.1] | 1 [ $< 0.1$ ] |
| Myocardial bridging                 | 0 [0.0] | 0 [0.0] | 0 [0.0] | 0 [0.0] | 1 [ $< 0.1$ ] | 0 [0.0] | 1 [ $< 0.1$ ] |
| Iridocyclitis                       | 0 [0.0] | 0 [0.0] | 0 [0.0] | 0 [0.0] | 1 [ $< 0.1$ ] | 0 [0.0] | 1 [ $< 0.1$ ] |
| Abdominal pain lower                | 0 [0.0] | 0 [0.0] | 0 [0.0] | 0 [0.0] | 1 [ $< 0.1$ ] | 0 [0.0] | 1 [ $< 0.1$ ] |
| Alcoholic liver disease             | 0 [0.0] | 0 [0.0] | 0 [0.0] | 0 [0.0] | 1 [ $< 0.1$ ] | 0 [0.0] | 1 [ $< 0.1$ ] |
| Medication overuse headache         | 0 [0.0] | 0 [0.0] | 0 [0.0] | 0 [0.0] | 1 [ $< 0.1$ ] | 0 [0.0] | 1 [ $< 0.1$ ] |
| Tooth abscess                       | 0 [0.0] | 0 [0.0] | 0 [0.0] | 0 [0.0] | 1 [ $< 0.1$ ] | 0 [0.0] | 1 [ $< 0.1$ ] |

|                                            |         |         |         |         |               |         |               |
|--------------------------------------------|---------|---------|---------|---------|---------------|---------|---------------|
| Postprocedural pulmonary embolism          | 0 [0.0] | 0 [0.0] | 0 [0.0] | 0 [0.0] | 1 [ $< 0.1$ ] | 0 [0.0] | 1 [ $< 0.1$ ] |
| Adenocarcinoma of the cervix               | 0 [0.0] | 0 [0.0] | 0 [0.0] | 0 [0.0] | 0 [0.0]       | 1 [0.1] | 1 [ $< 0.1$ ] |
| Invasive lobular breast carcinoma          | 0 [0.0] | 0 [0.0] | 0 [0.0] | 0 [0.0] | 1 [ $< 0.1$ ] | 0 [0.0] | 1 [ $< 0.1$ ] |
| Visual acuity reduced                      | 0 [0.0] | 0 [0.0] | 0 [0.0] | 0 [0.0] | 1 [ $< 0.1$ ] | 0 [0.0] | 1 [ $< 0.1$ ] |
| Appendicitis noninfective                  | 0 [0.0] | 0 [0.0] | 0 [0.0] | 0 [0.0] | 0 [0.0]       | 1 [0.1] | 1 [ $< 0.1$ ] |
| Vestibular migraine                        | 0 [0.0] | 0 [0.0] | 0 [0.0] | 0 [0.0] | 1 [ $< 0.1$ ] | 0 [0.0] | 1 [ $< 0.1$ ] |
| Cervicobrachial syndrome                   | 0 [0.0] | 0 [0.0] | 0 [0.0] | 0 [0.0] | 0 [0.0]       | 1 [0.1] | 1 [ $< 0.1$ ] |
| Subdural hematoma                          | 0 [0.0] | 0 [0.0] | 0 [0.0] | 0 [0.0] | 0 [0.0]       | 1 [0.1] | 1 [ $< 0.1$ ] |
| Transient ischemic attack                  | 0 [0.0] | 0 [0.0] | 0 [0.0] | 0 [0.0] | 0 [0.0]       | 1 [0.1] | 1 [ $< 0.1$ ] |
| Suicide attempt                            | 0 [0.0] | 0 [0.0] | 0 [0.0] | 0 [0.0] | 0 [0.0]       | 1 [0.1] | 1 [ $< 0.1$ ] |
| Dehydration                                | 0 [0.0] | 0 [0.0] | 0 [0.0] | 0 [0.0] | 0 [0.0]       | 1 [0.1] | 1 [ $< 0.1$ ] |
| Idiopathic intracranial hypertension       | 0 [0.0] | 0 [0.0] | 0 [0.0] | 0 [0.0] | 1 [ $< 0.1$ ] | 0 [0.0] | 1 [ $< 0.1$ ] |
| Lung adenocarcinoma stage III              | 0 [0.0] | 0 [0.0] | 0 [0.0] | 0 [0.0] | 1 [ $< 0.1$ ] | 0 [0.0] | 1 [ $< 0.1$ ] |
| Gastrointestinal hemorrhage                | 0 [0.0] | 0 [0.0] | 0 [0.0] | 0 [0.0] | 1 [ $< 0.1$ ] | 0 [0.0] | 1 [ $< 0.1$ ] |
| Peritoneal hemorrhage                      | 0 [0.0] | 0 [0.0] | 0 [0.0] | 0 [0.0] | 1 [ $< 0.1$ ] | 0 [0.0] | 1 [ $< 0.1$ ] |
| Pericarditis                               | 0 [0.0] | 0 [0.0] | 0 [0.0] | 0 [0.0] | 0 [0.0]       | 1 [0.1] | 1 [ $< 0.1$ ] |
| Arrhythmogenic right ventricular dysplasia | 0 [0.0] | 0 [0.0] | 0 [0.0] | 0 [0.0] | 0 [0.0]       | 1 [0.1] | 1 [ $< 0.1$ ] |
| Arteriosclerosis                           | 0 [0.0] | 0 [0.0] | 0 [0.0] | 0 [0.0] | 1 [ $< 0.1$ ] | 0 [0.0] | 1 [ $< 0.1$ ] |
| Hypertensive heart disease                 | 0 [0.0] | 0 [0.0] | 0 [0.0] | 0 [0.0] | 1 [ $< 0.1$ ] | 0 [0.0] | 1 [ $< 0.1$ ] |

---

MedDRA, Medical Dictionary for Regulatory Activities; pt-yr, patient-years;

N = number of patients who received at least one dose of erenumab or placebo; n = number of patients reporting at least one occurrence of an adverse event; e = sum across all patients, the total time at risk in years; r = exposure-adjusted patient incidence rate per 100 pt-yr ( $n/e \times 100$ ). Multiple occurrences of the same event for a patient are counted once within a dose level. Coded using MedDRA version 20.0

**Supplemental Table 2. Onset and duration of constipation adverse events**

|                                                      | <b>Erenumab 70/140 mg during<br/>DBTP<br/>N = 1400<br/>(pt-yr = 479.3)</b> | <b>Erenumab 70/140 mg during entire<br/>study<sup>a</sup><br/>N = 2499<br/>(pt-yr = 3084.6)</b> |
|------------------------------------------------------|----------------------------------------------------------------------------|-------------------------------------------------------------------------------------------------|
| Constipation, n [r]                                  | 33 [7.0]                                                                   | 73 [2.4]                                                                                        |
| Time to onset of constipation, days, median (Q1, Q3) | 7.0 (2.0, 41.0)                                                            | 48 (4.0, 190.0)                                                                                 |
| Time to onset, n                                     |                                                                            |                                                                                                 |
| < 1 week                                             | 16                                                                         | 21                                                                                              |
| 1–2 weeks                                            | 3                                                                          | 3                                                                                               |
| 2–3 weeks                                            | 2                                                                          | 4                                                                                               |
| 3–4 weeks                                            | 2                                                                          | 2                                                                                               |
| 1–2 months                                           | 5                                                                          | 7                                                                                               |
| ≥ 2 months                                           | 5                                                                          | 36                                                                                              |
| Duration, days, median (Q1, Q3)                      | 42.0 (18.0, 87.0)                                                          | 37.5 (14.0, 115.0)                                                                              |

DBTP, double-blind placebo-controlled treatment phase; pt-yr, patient-years; Q, quartile



---

Multiple occurrences of constipation adverse event for a patient were counted once. N = number of patients in the analysis set exposed to erenumab 70 or 140 mg; n = number of patients reporting at least one occurrence of constipation; e = sum across all patients, the total time at risk in years; r = exposure-adjusted patient incidence rate per 100 pt-yr ( $n/e * 100$ ). Time to onset was calculated as the time to the start date of the first occurrence of constipation since the first dose of erenumab 70 mg or 140 mg

<sup>a</sup>Includes patients from 7/21 mg groups in the DBTP who received 70 mg or 140 mg during extension phases and patients who received 70/140 mg during the DBTP who did not enroll in the extension phase

**Supplemental Table 3. Anti-erenumab antibodies during double-blind treatment phase**

|                                                               | Erenumab 70 mg | Erenumab 140 mg | Total    |
|---------------------------------------------------------------|----------------|-----------------|----------|
|                                                               | N = 893        | N = 507         | N = 1400 |
| Patients with an on-study result                              | 893            | 507             | 1400     |
| Binding antibody–positive, n (%)                              | 57 (6.4)       | 14 (2.8)        | 71 (5.1) |
| Neutralizing antibody–positive, n (%)                         | 3 (0.3)        | 0 (0.0)         | 3 (0.2)  |
| Patients with a result at baseline                            | 886            | 505             | 1381     |
| Pre-existing binding antibody, n (%)                          | 1 (0.1)        | 1 (0.2)         | 2 (0.1)  |
| Patients with postbaseline result                             | 885            | 504             | 1391     |
| Developing binding antibody–positive, <sup>a</sup> n (%)      | 56 (6.3)       | 13 (2.6)        | 69 (5.0) |
| Developing neutralizing antibody–positive, <sup>a</sup> n (%) | 3 (0.3)        | 0 (0.0)         | 3 (0.2)  |

N = Number of patients who received at least one dose of study drug during double-blind treatment phase

<sup>a</sup>Negative or no result at baseline

**Supplemental Table 4. Anti-erenumab antibodies during long-term analysis (DBTP + OLTP)**

|                                                            | DBTP, placebo<br>OLTP, erenumab 70/140 mg<br>N = 924 | DBTP, erenumab OLTP,<br>erenumab 70/140 mg<br>N = 1400 | Total<br>N = 2324 |
|------------------------------------------------------------|------------------------------------------------------|--------------------------------------------------------|-------------------|
| Developing binding antibody–positive <sup>a</sup>          | 74 (8.1)                                             | 110 (7.9)                                              | 184 (8.0)         |
| Transient <sup>b</sup>                                     | 34 (45.9)                                            | 60 (54.5)                                              | 94 (51.1)         |
| Developing neutralizing antibody–positive <sup>a</sup>     | 3 (0.3)                                              | 5 (0.4)                                                | 8 (0.3)           |
| Transient <sup>b</sup>                                     | 1 (33.3)                                             | 5 (100.0)                                              | 6 (75.0)          |
| Onset of developing binding antibody–positive <sup>c</sup> | N1 = 74                                              | N1 = 110                                               | N1 = 184          |
| Month 1                                                    | 3 (4.1)                                              | 13 (11.8)                                              | 16 (8.7)          |
| Months 2–3                                                 | 17 (23.0)                                            | 37 (33.6)                                              | 54 (29.3)         |
| Months 4–6                                                 | 25 (33.8)                                            | 26 (23.6)                                              | 51 (27.7)         |
| Months 6–12                                                | 24 (32.4)                                            | 26 (23.6)                                              | 50 (27.2)         |
| Months 12–18                                               | 4 (5.4)                                              | 7 (6.4)                                                | 11 (6.0)          |
| Months 18–24                                               | 1 (1.4)                                              | 1 (0.9)                                                | 2 (1.1)           |
| Months > 24                                                | 0 (0.0)                                              | 0 (0.0)                                                | 0 (0.0)           |

Data reported are n (%) unless otherwise indicated; % = n/N or n/N1 as appropriate. DBTP, double-blind placebo-controlled treatment phase; OLTP, open-label treatment phase. N = Number of patients whose first dose of erenumab during the DBTP or OLTP was 70 mg or 140 mg.

<sup>a</sup>Negative or no result at baseline

---

<sup>b</sup>Negative result at last on-study time point; percentage was calculated using the number of patients who developed binding or neutralizing antibodies, respectively, as denominator

<sup>c</sup>Time from erenumab exposure to the first occurrence of developing binding antibody–positive; percentage was calculated using the number of patients who developed binding antibodies as a denominator

**Supplemental Table 5. Exposure-adjusted adverse event rates by anti-erenumab antibody status**

|                                       | Placebo                | Erenumab 70/140 mg             |                                |
|---------------------------------------|------------------------|--------------------------------|--------------------------------|
|                                       |                        | Binding antibody negative      | Binding antibody positive      |
|                                       | <b>N = 1043</b>        | <b>N1 = 2116</b>               | <b>N1 = 184</b>                |
|                                       | <b>(pt-yr = 321.7)</b> | <b>(pt-yr = 2421.3)</b>        | <b>(pt-yr = 216.0)</b>         |
|                                       | <b>n [r]</b>           | <b>n [r]</b>                   | <b>n [r]</b>                   |
| Any adverse event                     | 72 [23.6]              | 331 [15.8]                     | 28 [14.5]                      |
| Hypersensitivity <sup>a</sup>         | 45 [14.5]              | 204 [9.1]                      | 17 [8.4]                       |
| Immune system disorders <sup>b</sup>  | 6 [1.9]                | 48 [2.0]                       | 1 [0.5]                        |
| Injection site reactions <sup>c</sup> | 34 [10.8]              | 151 [6.7]                      | 14 [6.8]                       |
|                                       |                        | Neutralizing antibody negative | Neutralizing antibody positive |
|                                       |                        | <b>N2 = 176</b>                | <b>N2 = 8</b>                  |
|                                       | <b>N = 1043</b>        | <b>(pt-yr = 207.7)</b>         | <b>(pt-yr = 8.2)</b>           |
|                                       | <b>(pt-yr = 321.7)</b> |                                |                                |
| Any adverse event                     | 72 [23.6]              | 26 [14.0]                      | 2 [28.0]                       |
| Hypersensitivity <sup>a</sup>         | 45 [14.5]              | 16 [8.2]                       | 1 [12.9]                       |
| Immune system disorders <sup>b</sup>  | 6 [1.9]                | 1 [0.5]                        | 0 [0.0]                        |
| Injection site reactions <sup>c</sup> | 34 [10.8]              | 13 [6.6]                       | 1 [13.1]                       |

N = Number of patients who received at least one dose of placebo in the DBTP; Anti-erenumab antibodies were not tested in patients randomized to placebo

---

N1 = Number of patients who received first erenumab dose at 70 mg or 140 mg and had a binding antibody result

N2 = Number of patients who received first erenumab dose at 70 mg or 140 mg and had a neutralizing antibody result; Neutralizing antibodies were not tested in patients without binding antibody-positive

MedDRA, Medical Dictionary for Regulatory Activities; pt-yr, patient-years

Multiple occurrences of the same event for a patient are counted as single events within a treatment group. Coded using MedDRA version 20.0

<sup>a</sup>Potential hypersensitivity reactions were identified using the hypersensitivity standardized MedDRA query

<sup>b</sup>Potential immune system disorders were identified using the immune system disorder MedDRA system order class

<sup>c</sup>Potential ISRs were identified using preferred terms consistent with ISRs from the administration-site reactions and ISRs high-level terms
